# Supplementary material
Source: PubMed Central journal article supplement (PMC4230329)
Supplement: bi5012354_si_001.pdf [file bi5012354_si_001.pdf]

# **Characterization of the Binding Interaction Between the Oncoprotein Gankyrin and a Grafted S6 ATPase**

Alex M. Chapman,<sup>†</sup> Bryce E. Rogers<sup>†</sup> and Brian R. McNaughton<sup>\*,†,‡</sup>

<sup>†</sup>Departments of Chemistry, and <sup>‡</sup>Biochemistry & Molecular Biology,  
Colorado State University, Fort Collins, Colorado 80523, USA

E-mail: [brian.mcnaughton@colostate.edu](mailto:brian.mcnaughton@colostate.edu)

## Table of Contents

### Materials and Instrumentation

|                      |    |
|----------------------|----|
| Materials.....       | S3 |
| Instrumentation..... | S3 |

### Additional Experimental Data

|                                                                     |     |
|---------------------------------------------------------------------|-----|
| Protein Purification.....                                           | S4  |
| Lysate Ni-NTA Pull-down Assay .....                                 | S4  |
| Isothermal Titration Calorimetry (ITC).....                         | S4  |
| Circular Dichroism (CD) .....                                       | S5  |
| Figure S1. SDS-PAGE of Purified Proteins.....                       | S6  |
| Figure S2. ITC of wt-FtsH and Gankyrin.....                         | S7  |
| Figure S3. ITC Data.....                                            | S8  |
| Figure S4. ITC Binding Stoichiometry.....                           | S10 |
| Figure S5. Protein Sequences .....                                  | S11 |
| Figure S6. Oligonucleotides used to prepare constructs for ITC..... | S14 |

## Materials and Methods

### Materials

All chemicals obtained from Sigma-Aldrich unless specified  
LB Miller Broth, Fisher  
5-alpha chemically competent *E. coli*, NEB  
BL21 (DE3) chemically competent *E. coli*, NEB  
Agar, Fisher  
Carbenicillin, GoldBio Technology  
Restriction Enzymes, NEB  
Kanamycin, GoldBio Technology  
Isopropyl- $\beta$ -D-1-thiogalactopyranoside (IPTG), GoldBio Technology  
Snakeskin Dialysis Tubing 10K MWCO, Thermo Scientific  
Quick Ligation Kit, NEB  
Q5 High Fidelity DNA Polymerase, NEB  
Oligonucleotides, IDT  
Miniprep Kit, OMEGA  
PageRuler Prestained Protein Ladder, Thermo Scientific  
12% Ready Gel precast gels, Biorad  
Modified Lowry Protein Assay Kit, Pierce  
cComplete ULTRA Tablets, Roche

All water was obtained from a Milli-Q water purification system.

### Instrumentation

Sonifer W-350 cell disruptor, Branson  
J2-21 centrifuge, Beckman Coulter  
MJ mini gradient thermal cycler, Biorad  
iTC200, Microcal (Malvern)  
Molecular imager gel doc XR+ system, Biorad  
Innova 42/42R incubator shakers, New Brunswick Scientific  
Circular dichroism spectrometer, Aviv model 202  
NanoDrop 2000 UV-Vis Spectrophotometer, Thermo Scientific

## Experimental Data

### Protein Purification

Grafted FtsH-S6 ATPase was overlapped and amplified by PCR using oligonucleotides, and cloned into a pET plasmid using restriction enzymes BamHI and PaeI, resulting in a N-terminally His<sub>6</sub> tagged construct, which was confirmed by DNA sequencing (all constructs in this manuscript were confirmed by GENEWIZ, South Plainfield, NJ). FtsH-S6 ATPase mutants were made using site-directed mutagenesis. These constructs were transformed into BL21s (DE3). Gankyrin was cloned into a pET plasmid using restriction enzymes NcoI and PaeI, resulting in a C-terminally His<sub>6</sub> tagged construct, and transformed into BL21s (DE3). Gankyrin mutants were made using site-directed mutagenesis, and transformed into BL21s (DE3). Cells were grown in 1-2.5 L LB cultures containing carbenicillin at 37 °C to OD<sub>600</sub> = ~0.6 and induced with 1 mM IPTG at 25 °C for 8 hrs. Cells were then collected by centrifugation, resuspended in phosphate buffer (20 mM sodium phosphate pH 7.4, 150 mM NaCl) with protease inhibitor tablets and stored at -20 °C. Frozen pellets were thawed and sonicated for 2 minutes. The lysate was cleared by centrifugation (15000 rpm, 30 min.) and the supernatant was mixed with 1 mL of Ni-NTA agarose resin for 1 hour. The resin was collected by centrifugation (4950 rpm, 5 min.). The resin was washed with 50 mL of buffer containing 20 mM imidazole, followed by 10 mL with 50 mM imidazole. The protein was then eluted with 5 mL buffer containing 400 mM imidazole. The proteins were dialyzed against buffer and analyzed for purity by SDS-PAGE. Purified proteins were quantified using absorbance at 280nm and confirmed with a modified Lowry Assay.

### Lysate Ni-NTA Pulldown Assay

Gankyrin variants were cloned into MCS1 of pET using restriction enzymes BamHI and HindIII, resulting in N-terminal His<sub>6</sub>-tagged constructs. FtsH-S6 ATPase constructs were cloned into MCS2 of pET using the restriction enzymes NdeI and PaeI. Completed constructs were transformed into BL21s (DE3). Cells containing the co-expressed pair were inoculated and induced as described previously. Cells were spun down and resuspended in lysis buffer (20 mM sodium phosphate pH 7.4, 150 mM NaCl, 1 mM DTT) lysed by sonication, and spun down to remove cell debris. Cleared lysate was incubated with 100 µL Ni-NTA agarose resin for 1 hour. Ni-NTA agarose was washed with 5mL lysis buffer and 5mL lysis buffer with 20 mM imidazole. Proteins were eluted with lysis buffer containing 400 mM imidazole. The pulldown was analyzed by SDS-PAGE.

### Isothermal Titration Calorimetry

Isothermal titration calorimetry was performed using a MicroCal iTC200 calorimeter maintained at 25 °C. All proteins were purified as described previously and dialyzed

extensively in phosphate buffer (20 mM sodium phosphate pH 7.4, 150 mM NaCl, 2.5 mM 2-mercaptoethanol). FtsH-S6 ATPase variants were placed in the sample cell at concentrations ranging from 15-18  $\mu\text{M}$  (30  $\mu\text{M}$  for FtsH-S6 R338A/R339A/R342A), and 150-180  $\mu\text{M}$  (500  $\mu\text{M}$  for FtsH-S6 R338A/R339A/R342A interaction) of Gankyrin variants were titrated in 2.49  $\mu\text{L}$  increments (16 injections total), with an initial injection of 0.2  $\mu\text{L}$ , at 180 sec intervals using a stirring speed of 750 rpm. Heats of dilution were measured in the same manner described above, separately titrating buffer into buffer and Gankyrin (and all mutants) into buffer. Data were analyzed using Origin7.0 (MicroCal, iTC200) using a one set of sites binding model for fitting. All data were reference subtracted by subtracting the mean heat of dilution from each data point.

### **Circular Dichroism**

Proteins were purified as described above. Separately, each protein was diluted to 5  $\mu\text{M}$  in phosphate buffer (20 mM sodium phosphate pH 7.4, 150 mM NaCl, 2.5 mM 2-mercaptoethanol) and placed in a quartz cuvette with a pathlength of 0.2 cm. Data were collected on an Aviv model 202 circular dichroism spectrometer. Wavelength data were taken from scans of 250 nm to 200 nm in 1 nm steps at 25 °C.

**Figure S1. SDS-PAGE of Purified Proteins.** PAGE analysis of purified grafted FtsH-S6 ATPase and Gankyrin, including mutants thereof, used for ITC analysis.

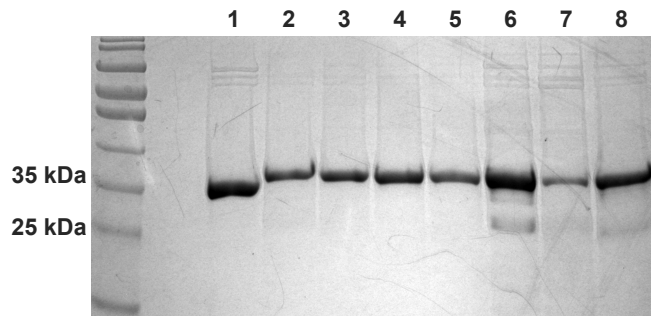

Lane 1: wt FtsH  
Lane 2: FtsH-S6  
Lane 3: FtsH-S6 R342A  
Lane 4: FtsH-S6 R338A/R342A  
Lane 5: FtsH-S6 R338A/R339A/R342A  
Lane 6: FtsH-S6 E356A/E357A  
Lane 7: FtsH-S6 D359A/D362A  
Lane 8: FtsH-S6 K397E

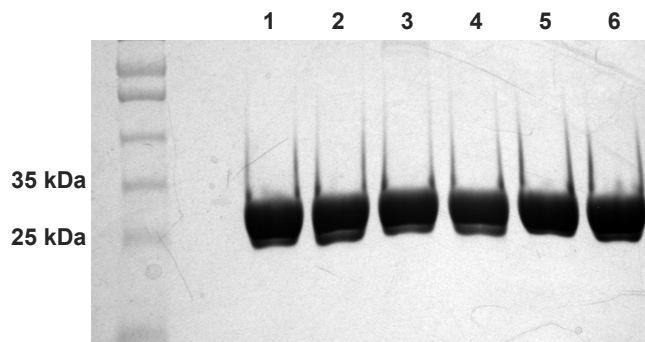

Lane 1: Gankyrin  
Lane 2: Gankyrin R41A  
Lane 3: Gankyrin K116A  
Lane 4: Gankyrin R41A/K116A  
Lane 5: Gankyrin D39A/D71A  
Lane 6: Gankyrin E182A

**Figure S2. ITC of wt-FtsH and Gankyrin.** ITC evaluation of wild-type FtsH from *E. coli* and Gankyrin. No appreciable binding was observed.

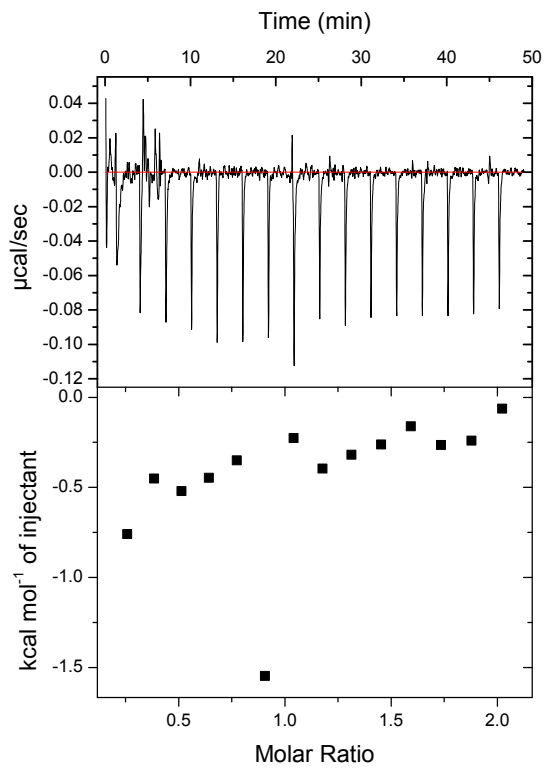

**Figure S3. ITC Data (summarized in Table 1).** Representative ITC binding isotherms involving Gankyrin and grafted FtsH-S6 ATPase, and specific mutants thereof.

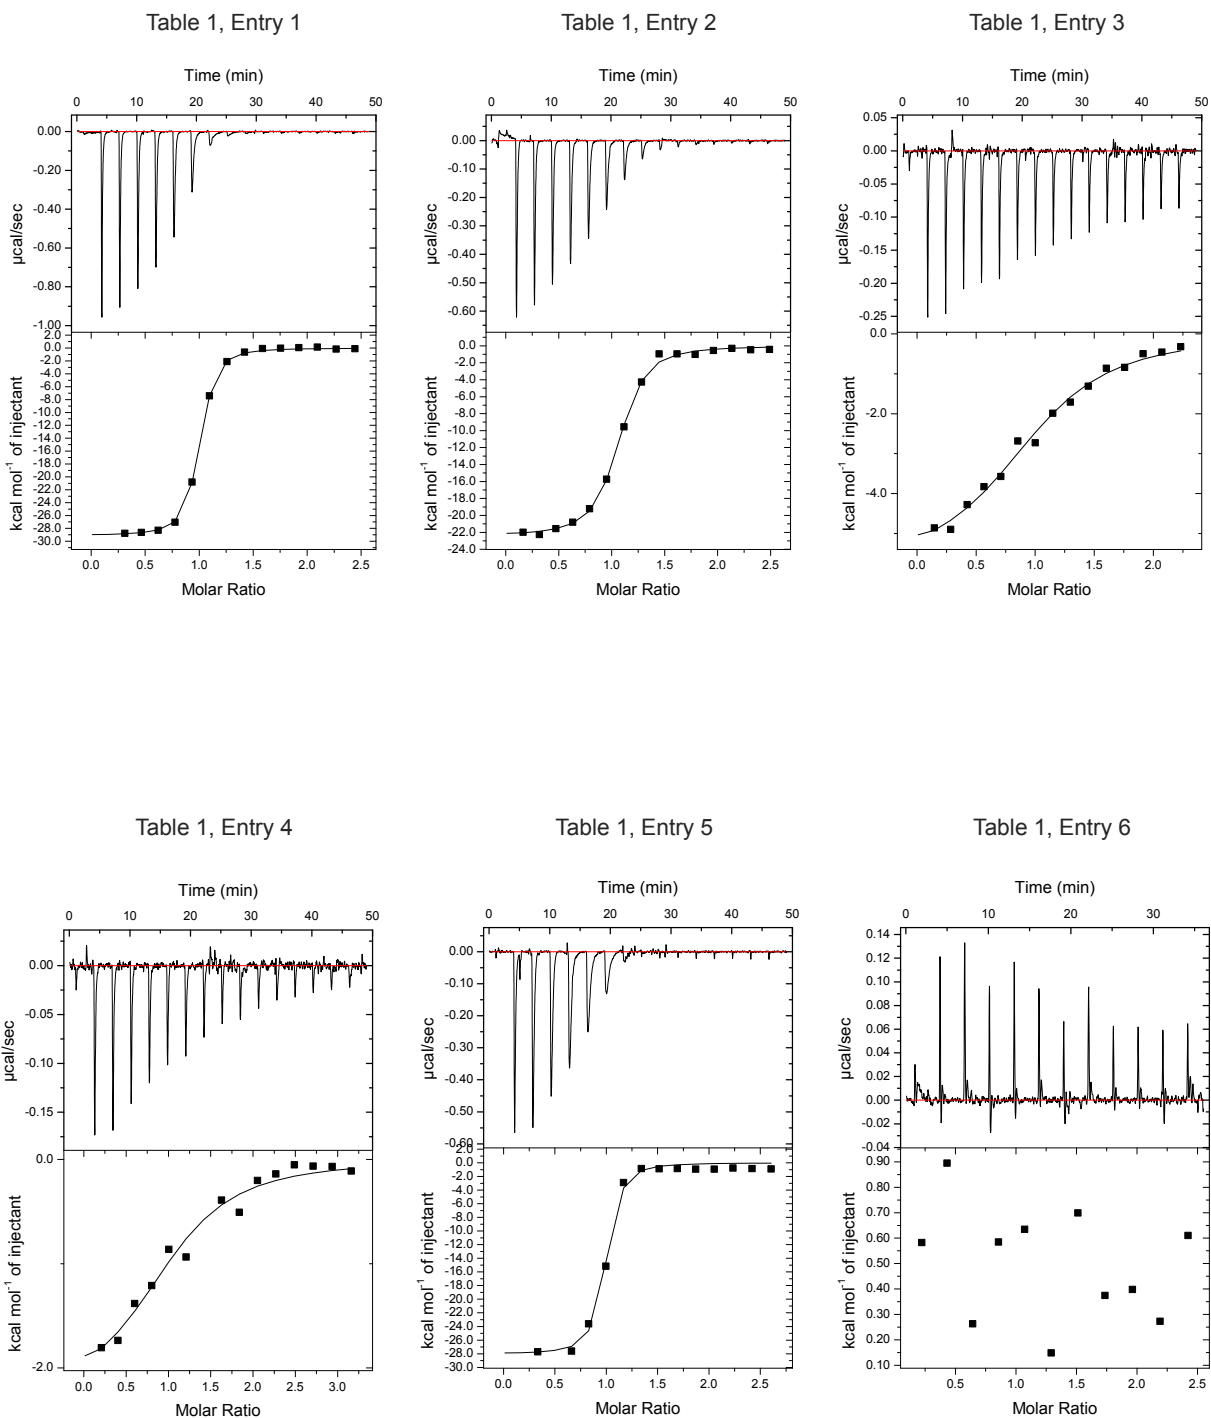



Table 1, Entry 7

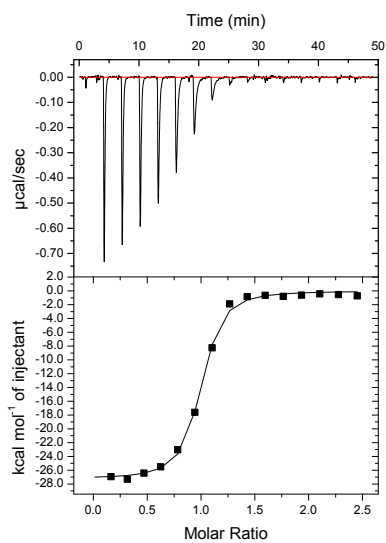

Table 1, Entry 8

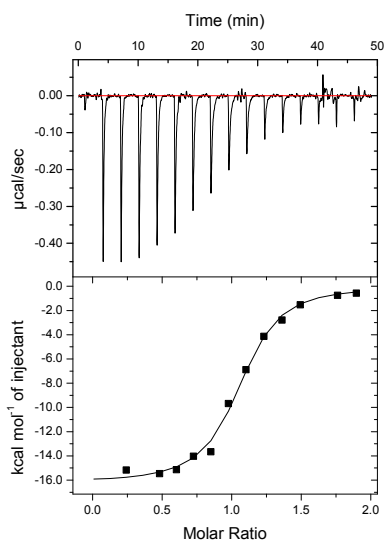

Table 1, Entry 9

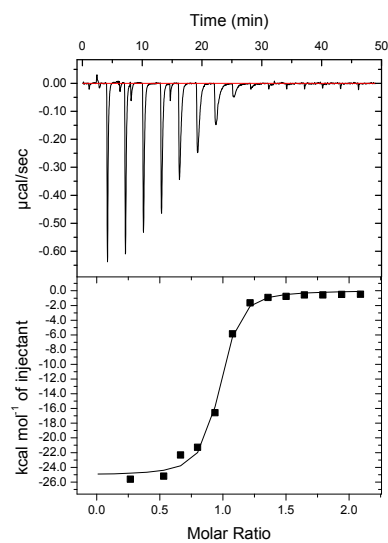

Table 1, Entry 10

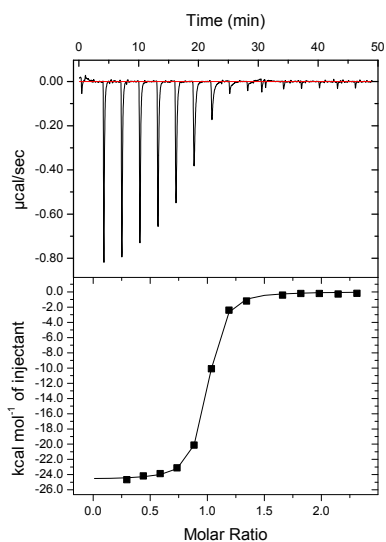

Table 1, Entry 11

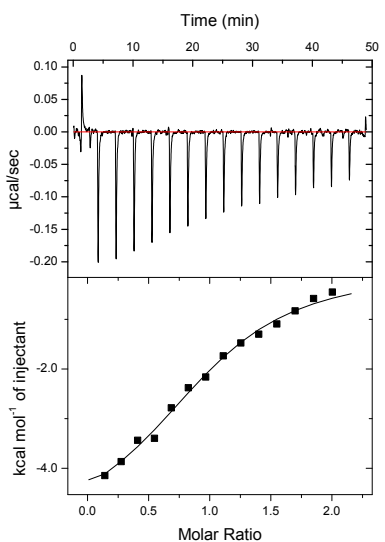

Table 1, Entry 12

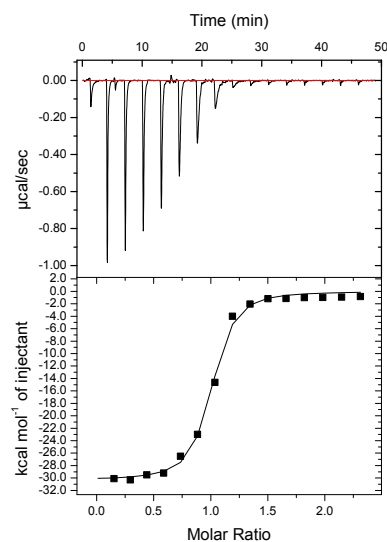

**Figure S4. ITC Binding Stoichiometry.** N-values for each entry in Table 1. All error represents the standard deviation of three separate experiments.

| Entry | gankyrin mutant | FtsH-S6 ATPase mutant | N-value    |
|-------|-----------------|-----------------------|------------|
| 1     | wt-gankyrin     | wt-FtsH-S6 ATPase     | 0.93±0.01  |
| 2     | wt-gankyrin     | R342A                 | 1.02±0.02  |
| 3     | wt-gankyrin     | R338A/R342A           | 0.99±0.03  |
| 4     | wt-gankyrin     | R338A/R339A/R342A     | 1.01±0.04  |
| 5     | wt-gankyrin     | E356A/E357A           | 0.93±0.02  |
| 6     | wt-gankyrin     | D359A/D362A           | no binding |
| 7     | wt-gankyrin     | K397E                 | 0.94±0.01  |
| 8     | R41A            | wt-FtsH-S6 ATPase     | 0.99±0.04  |
| 9     | K116A           | wt-FtsH-S6 ATPase     | 0.91±0.01  |
| 10    | D39A/D71        | wt-FtsH-S6 ATPase     | 0.93±0.02  |
| 11    | R41A/K116A      | wt-FtsH-S6 ATPase     | 0.97±0.05  |
| 12    | E182A           | wt-FtsH-S6 ATPase     | 0.97±0.02  |

## Figure S5. Protein Sequences.

### Gankyrin

MEGCVSNIMICNLAYSGKLDLKERILADKSLATRTRDQDSRTALHWACSAGHTEIVEFL  
LQLGVPVNDKDDAGWSPLHIAASAGRDEIVKALLVKGAVNAVNQNGCTPLHYAASK  
NRHEIAVMLLEGGANPDAKDHYDATAMHRAAAKGNLKMVHILLFYKASTNIQDTEGNT  
PLHLACDEERVVEAKFLVTQGASIYIENKEEKTPLQVAKGGLGLILKRLAEGEEASMGH  
HHHHH\*

### Gankyrin R41A

MEGCVSNIMICNLAYSGKLDLKERILADKSLATRTRDQDS<sup>A</sup>TALHWACSAGHTEIVEFL  
LQLGVPVNDKDDAGWSPLHIAASAGRDEIVKALLVKGAVNAVNQNGCTPLHYAASK  
NRHEIAVMLLEGGANPDAKDHYDATAMHRAAAKGNLKMVHILLFYKASTNIQDTEGNT  
PLHLACDEERVVEAKFLVTQGASIYIENKEEKTPLQVAKGGLGLILKRLAEGEEASMGH  
HHHHH\*

### Gankyrin K116A

MEGCVSNIMICNLAYSGKLDLKERILADKSLATRTRDQDSRTALHWACSAGHTEIVEFL  
LQLGVPVNDKDDAGWSPLHIAASAGRDEIVKALLVKGAVNAVNQNGCTPLHYAAS<sup>A</sup>  
NRHEIAVMLLEGGANPDAKDHYDATAMHRAAAKGNLKMVHILLFYKASTNIQDTEGNT  
PLHLACDEERVVEAKFLVTQGASIYIENKEEKTPLQVAKGGLGLILKRLAEGEEASMGH  
HHHHH\*

### Gankyrin R41A/K116A

MEGCVSNIMICNLAYSGKLDLKERILADKSLATRTRDQDS<sup>A</sup>TALHWACSAGHTEIVEFL  
LQLGVPVNDKDDAGWSPLHIAASAGRDEIVKALLVKGAVNAVNQNGCTPLHYAAS<sup>A</sup>  
NRHEIAVMLLEGGANPDAKDHYDATAMHRAAAKGNLKMVHILLFYKASTNIQDTEGNT  
PLHLACDEERVVEAKFLVTQGASIYIENKEEKTPLQVAKGGLGLILKRLAEGEEASMGH  
HHHHH\*

### Gankyrin D39A/D71A

MEGCVSNIMICNLAYSGKLDLKERILADKSLATRTRDQ<sup>A</sup>SRTALHWACSAGHTEIVEFL  
LQLGVPVNDKD<sup>A</sup>AGWSPLHIAASAGRDEIVKALLVKGAVNAVNQNGCTPLHYAASK  
NRHEIAVMLLEGGANPDAKDHYDATAMHRAAAKGNLKMVHILLFYKASTNIQDTEGNT  
PLHLACDEERVVEAKFLVTQGASIYIENKEEKTPLQVAKGGLGLILKRLAEGEEASMGH  
HHHHH\*

### Gankyrin E182A

MEGCVSNIMICNLAYSGKLDLKERILADKSLATRTRDQDSRTALHWACSAGHTEIVEFL  
LQLGVPVNDKDDAGWSPLHIAASAGRDEIVKALLVKGAVNAVNQNGCTPLHYAASK  
NRHEIAVMLLEGGANPDAKDHYDATAMHRAAAKGNLKMVHILLFYKASTNIQDTEGNT

PLHLACD**A**ERVEEAKFLVTQGASIIYENKEEKTPLQVAKGGLGLILKRLAEGEEASMGH  
HHHHH\*

wt FtsH

MGSSHHHHHHSQDPLTEDQIKTTFADVAGCDEAKEEVAELVEYLREPSRFQKLGKIP  
KGVLMVGPPGTGKTLAKAIAGEAKVPFFTISGSDFVEMFVGVGASRVRDMFEQAKKA  
APCIIFIDEIDAVGRQRGAGLGGGHDEREQTLNQMLVEMDGFEGNEGIIVIAATNRPDV  
LDPALLRPGRFDRQVVVGLPDRRGK**R**QIFSTHTSKMNLSEEVDLEDYVARPDKISGAD  
ANLVNEAALFAARGNKR~~V~~SMVEFEKAKDKIMMGA\*

FtsH-S6

MGSSHHHHHHSQDPLTEDQIKTTFADVAGCDEAKEEVAELVEYLREPSRFQKLGKIP  
KGVLMVGPPGTGKTLAKAIAGEAKVPFFTISGSDFVEMFVGVGASRVRDMFEQAKKA  
APCIIFIDEIDAVGRQRGAGLGGGHDEREQTLNQMLVEMDGFEGNEGIIVIAATNRPDV  
LDPALLRPGRFDRQVVVGLPDRRGK**R**QIFSTHTSKMNLSEEVDLEDYVARPDKISGAD  
INSICQESGMLAVRENRYIVLAKDFEKAYKTVIKKDEQEHEFYK\*

FtsH-S6 R342A

MGSSHHHHHHSQDPLTEDQIKTTFADVAGCDEAKEEVAELVEYLREPSRFQKLGKIP  
KGVLMVGPPGTGKTLAKAIAGEAKVPFFTISGSDFVEMFVGVGASRVRDMFEQAKKA  
APCIIFIDEIDAVGRQRGAGLGGGHDEREQTLNQMLVEMDGFEGNEGIIVIAATNRPDV  
LDPALLRPGRFDRQVVVGLPDRRGK**A**QIFSTHTSKMNLSEEVDLEDYVARPDKISGAD  
INSICQESGMLAVRENRYIVLAKDFEKAYKTVIKKDEQEHEFYK\*

FtsH-S6 R338A/R342A

MGSSHHHHHHSQDPLTEDQIKTTFADVAGCDEAKEEVAELVEYLREPSRFQKLGKIP  
KGVLMVGPPGTGKTLAKAIAGEAKVPFFTISGSDFVEMFVGVGASRVRDMFEQAKKA  
APCIIFIDEIDAVGRQRGAGLGGGHDEREQTLNQMLVEMDGFEGNEGIIVIAATNRPDV  
LDPALLRPGRFDRQVVVGLPD**A**RGK**A**QIFSTHTSKMNLSEEVDLEDYVARPDKISGAD  
INSICQESGMLAVRENRYIVLAKDFEKAYKTVIKKDEQEHEFYK\*

FtsH-S6 R338A/R339A/R342A

MGSSHHHHHHSQDPLTEDQIKTTFADVAGCDEAKEEVAELVEYLREPSRFQKLGKIP  
KGVLMVGPPGTGKTLAKAIAGEAKVPFFTISGSDFVEMFVGVGASRVRDMFEQAKKA  
APCIIFIDEIDAVGRQRGAGLGGGHDEREQTLNQMLVEMDGFEGNEGIIVIAATNRPDV  
LDPALLRPGRFDRQVVVGLPD**AA**GK**A**QIFSTHTSKMNLSEEVDLEDYVARPDKISGAD  
INSICQESGMLAVRENRYIVLAKDFEKAYKTVIKKDEQEHEFYK\*

FtsH-S6 E356A/E357A

MGSSHHHHHHSQDPLTEDQIKTTFADVAGCDEAKEEVAELVEYLREPSRFQKLGKIP  
KGVLMVGPPGTGKTLAKAIAGEAKVPFFTISGSDFVEMFVGVGASRVRDMFEQAKKA  
APCIIFIDEIDAVGRQRGAGLGGGHDEREQTLNQMLVEMDGFEGNEGIIVIAATNRPDV  
LDPALLRPGRFDRQVVVGLPDRRGK**AA**VDLEDYVARPDKISGAD  
INSICQESGMLAVRENRYIVLAKDFEKAYKTVIKKDEQEHEFYK\*

FtsH-S6 D359A/D362A

MGSSHHHHHSQDPLTEDQIKTTFADVAGCDEAKEEVAELVEYLREPSRFQKLGKIP  
KGVLMVGPPGTGKTLLAKAIAGEAKVPFFTISGSDFVEMFVGVGASRVRDMFEQAKKA  
APCIIFIDEIDAVGRQRGAGLGGGHDEREQTLNQMLVEMDGFEGNEGIIVIAATNRPDV  
LDPALLRPGRFDRQVVVGLPDRRGKRQIFSTHTSKMNLSEEVALEYVARPDKISGAD  
INSICQESGMLAVRENRYIVLAKDFEKAYKTVIKKDEQEHEFYK\*

FtsH-S6 K397E

MGSSHHHHHSQDPLTEDQIKTTFADVAGCDEAKEEVAELVEYLREPSRFQKLGKIP  
KGVLMVGPPGTGKTLLAKAIAGEAKVPFFTISGSDFVEMFVGVGASRVRDMFEQAKKA  
APCIIFIDEIDAVGRQRGAGLGGGHDEREQTLNQMLVEMDGFEGNEGIIVIAATNRPDV  
LDPALLRPGRFDRQVVVGLPDRRGKRQIFSTHTSKMNLSEEVLEDYVARPDKISGAD  
INSICQESGMLAVRENRYIVLAEDFEKAYKTVIKKDEQEHEFYK\*

**Figure S6. Oligonucleotides used to prepare constructs for ITC.** All DNA primers are listed 5' to 3'

FtsH-S6 ATPase overlap primers

FP1: CATGCCATGGGCAGCAGCCATCACCATCATCACCACAGCC

RP1: GTCTTCGGTCAGCGGATCCTGGCTGTGGTGATGATGGTGA

FP2: AGGATCCGCTGACCGAAGACCAGATCAAAACCACNTTCGC

RP2: CGTCGCAACCAGCAACGTCAGCGAANGTGGTTTTGATCTG

FP3: TGACGTTGCTGGTTGCGACGAAGCTAAAGAAGAAGTTGCT

RP3: CGCAGGTATTCAACCAGTTCAGCAACTTCTTCTTTAGCTT

FP4: GAACTGGTTGAATACCTGCGTGAACCGTCTCGTTTCCAGA

RP4: CGGGATTTTACCACCCAGTTTCTGGAAACGAGACGGTTCA

FP5: AACTGGGTGGTAAAATCCCGAAAGGTGTTCTGATGGTTGG

RP5: TTTTACCGGTACCCGGCGGACCAACCATCAGAACACCTTT

FP6: TCCGCCGGGTACCGGTAAAACCCTGCTGGCTAAAGCTATC

RP6: GGAACCTTCTAGCTTACCAGCGATAGCTTTAGCCAGCAGGG

FP7: GCTGGTGAAGCTAAAGTTCCGTTCTTACCATCTCTGGTT

RP7: GAACATTTCAACGAAGTCAGAACCAGAGATGGTGAAGAAC

FP8: CTGACTTCGTTGAAATGTTTCGTTGGTGGTGGTCTTCTCG

RP8: GTTCGAACATGTCACGAACACGAGAAGCACCAACACCAAC

FP9: TGTTTCGTGACATGTTTCGAACAGGCTAAAAAAGCTGCTCCG

RP9: TCGTCGATGAAGATGATGCACGGAGCAGCTTTTTTTAGCCT

FP10: TGCATCATCTTCATCGACGAAATCGACGCTGTTGGTCGTC

RP10: ACCCAGACCAGCACCACGCTGACGACCAACAGCGTCGATT

FP11: AGCGTGGTGCTGGTCTGGGTGGTGGTTCACGACGAACGTGA

RP11: GCATCTGGTTCAGGGTCTGTTTCACGTTTCGTCGTGACCACC

FP12: ACAGACCCTGAACCAGATGCTGGTTGAAATGGACGGTTTC

RP12: ATGATACCTTCGTTACCTTCGAAACCGTCCATTTCAACCA

FP13: GAAGGTAACGAAGGTATCATCGTTATCGCTGCTACCAACC

RP13: CGGGTCGAGAACGTCCGGACGGTTGGTAGCAGCGATAACG

FP14: GTCCGGACGTTCTCGACCCGGCTCTGCTGCGTCCGGGTCCG

RP14: CAACAACCTGACGGTTCGAAACGACCCGGACGCAGCAGAGC

FP15: TTTGACCGTCAGGTTGTTGTTGGTCTGCCGGACCGCCGC

RP15: GAGAAAATCTGTCTCTTCCCGCGGGTCCGGCAGACCAA

FP16: GGAAGAGACAGATTTTCTCCACTCACACTAGCAAGATGA

RP16: GTCAACCTCCTCAGAGAGGTTTCATCTTGCTAGTGTGAGTG

FP17: ACCTCTCTGAGGAGGTTGACTTGGAAGACTATGTGGCCCG

RP17: CTCCTGAAATCTTATCTGGCCGGGCCACATAGTCTTCCAA

FP18: GCCAGATAAGATTTTCAGGAGCTGATATTAACCTCCATCTGT

RP18: GCCAACATTCCACTCTCCTGACAGATGGAGTTAATATCAG

FP19: CAGGAGAGTGGAATGTTGGCTGTCCGTGAAAACCGCTACA

RP19: GAAGTCCTTGCCAGGACAATGTAGCGGTTTTACGGACA

FP20: TTGTCCTGGCCAAGGACTTCGAGAAAGCATACAAGACTGT

RP20: CCTGCTCGTCCTTCTTGATGACAGTCTTGATGCTTTCTC

FP21: CATCAAGAAGGACGAGCAGGAGCATGAGTTTTACAAGTGA

RP21: CCTTAATTAATCACTTGTA AAACTCATGCT

#### FtsH-S6 ATPase mutant primers

R342A FP: CCGGACCGCCGCGGGAAGGCACAGATTTTCTCCACTCAC

R342A RP: GTGAGTGGAGAAAATCTGTGCCTTCCCGCGGGCGGTCCGG

R338A/R342A FP: GTTGTGGTCTGCCGGACGCCGCGGGAAGGCACAGATTTTCTCCACTCAC

R338A/R342A RP: GTGAGTGGAGAAAATCTGTGCCTTCCCGCGGGCGTCCGGCAGACCAACAAC

R338A/R339A/R342A FP:  
GTTGTGGTCTGCCGGACGCCGCGGGAAGGCACAGATTTTCTCCACTCAC

R338A/R339A/R342A RP:  
GTGAGTGGAGAAAATCTGTGCCTTCCCGCGGGCGTCCGGCAGACCAACAAC

E356A/E357A FP: GCAAGATGAACCTCTCTGCGGCGGTTGACTTGGAAGACTATG

E356A/E357A RP: CATAGTCTTCCAAGTCAACCGCCGCAGAGAGGTTTCATCTTGC

D359A/D362A FP: CCTCTCTGAGGAGGTTGCCTTGGAAGCCTATGTGGCCCGGCCAG

D359A/D362A RP: CTGGCCGGGCCACATAGGCTTCCAAGGCAACCTCCTCAGAGAGG

K397E FP: CTACATTGTCCTGGCCGAGGACTTCGAGAAAGC

K397E RP: GCTTTCTCGAAGTCCTCGGCCAGGACAATGTAG

Gankyrin mutant primers

R41A FP: CTAGAACTGATCAGGACAGCGCAACAGCTTTGCACTGGGCATG

R41A RP: CATGCCCAGTGCAAAGCTGTTGCGCTGTCCTGATCAGTTCTAG

K116A FP: CACTCCATTATGCAGCTTCGGCGAATAGGCATGAGATTGCTG

K116A RP: CAGCAATCTCATGCCTATTCGCCGAAGCTGCATAATGGAGTG

D39A FP: GCTACTAGAACTGATCAGGCCAGCAGAACAGCTTTGCAC

D39A RP: GTGCAAAGCTGTTCTGCTGGCCTGATCAGTTCTAGTAGC

D71A FP: GCCAGTGAATGATAAAGATGCCGCAGGTTGGTCTCCTCTTC

D71A RP: GAAGAGGAGACCAACCTGCGGCATCTTTATCATTCACTGGC

E182A FP: CACTTAGCCTGTGATGCAGAGAGAGTGGAAGAG

E182A RP: CTCTTCCACTCTCTCTGCATCACAGGCTAAGTG

Gankyrin primers

Gankyrin FP (w/ NcoI cut site): CATGCCATGGAGGGGTGTGTGTCTAACATAATGATCTGTAACC

Gankyrin RP (w/ PaeI cut site):

CCTTAATTAATTAGTGATGGTGGTGGTGTGATGACCCATAGAAGCCTCTTCACCTTCTGCTA
